# Supplementary material for: Excessive folate synthesis limits lifespan in the C. elegans: E. coli aging model
Source: PubMed Central journal article supplement (PMC3583181; doi:10.1186/1741-7007-10-67), 2012-07-31

Virk *et al.* Additional File 2

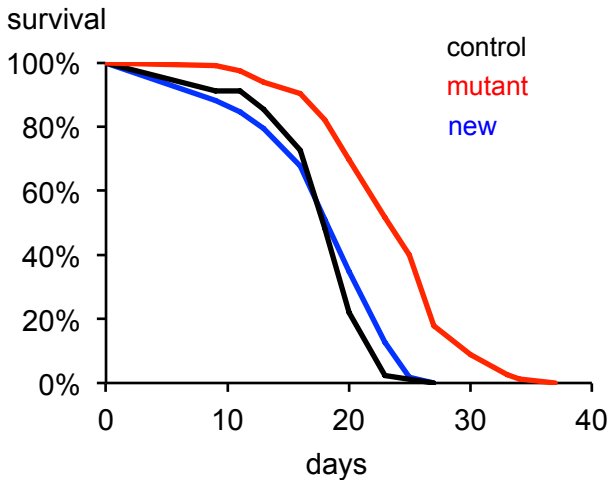

Supplement: 1741-7007-10-67-S2.pdf [file 1741-7007-10-67-S2.pdf]
