# Supplementary material for: Excessive folate synthesis limits lifespan in the C. elegans: E. coli aging model
Source: PubMed Central journal article supplement (PMC3583181; doi:10.1186/1741-7007-10-67), 2012-07-31
Supplement: 1741-7007-10-67-S4.pdf [file 1741-7007-10-67-S4.pdf]

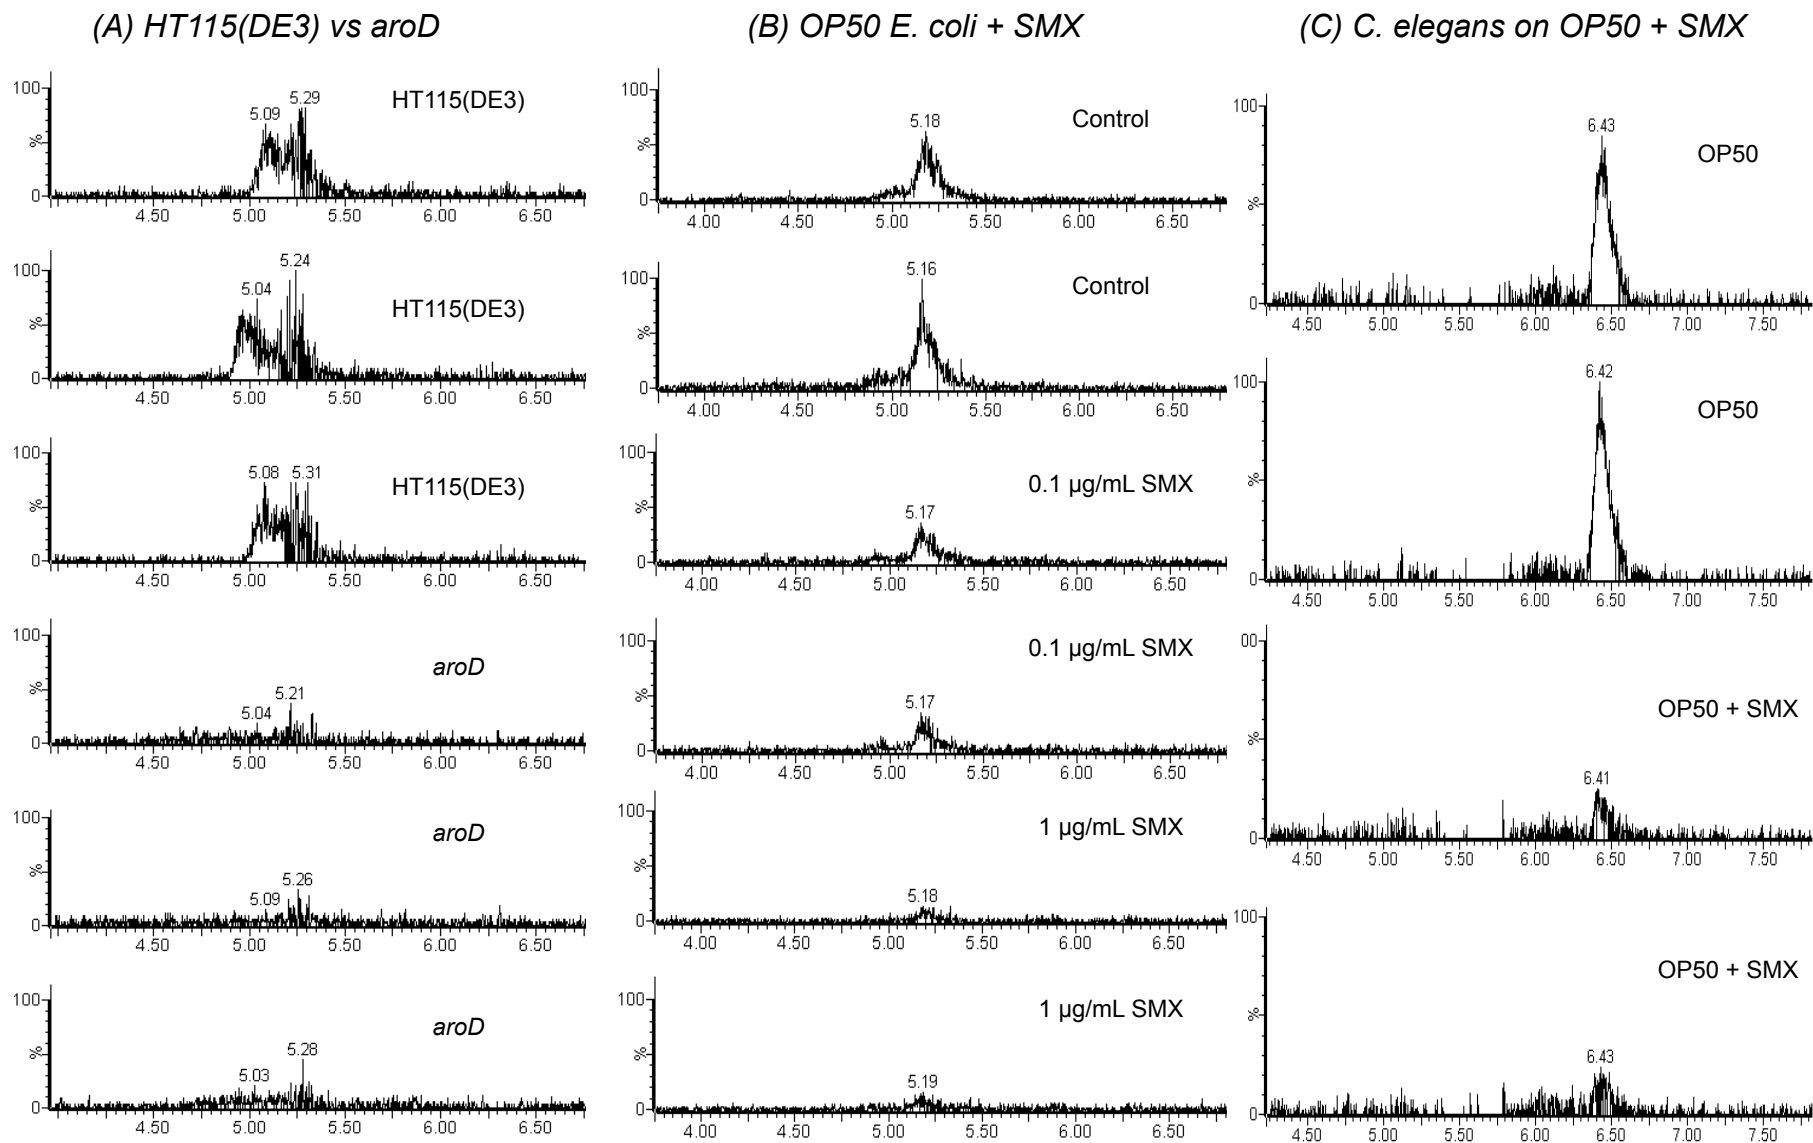

(A) Comparison of formylTHFGlu<sub>3</sub> levels on HT115(DE3) and HT115(DE3)*aroD* *E. coli*, 3 biological replicates each ( $m/z = -730.244 \pm 0.1$  Da)

(B) Traces of formylTHFGlu<sub>3</sub> levels in *OP50 E. coli* and *OP50* treated with 0.1 µg/ml and 1 µg/ml SMX, 2 biological replicates each ( $m/z = -730.244 \pm 0.1$  Da)

(C) HPLC-MS traces of 5-methylTHFGlu<sub>5</sub> levels in *C. elegans* grown on *OP50 E. coli* and *OP50* plus 128 µg/ml SMX, 2 biological replicates for each condition ( $m/z = -974.344 \pm 0.1$  Da)
