# Supplementary material for: Excessive folate synthesis limits lifespan in the C. elegans: E. coli aging model
Source: PubMed Central journal article supplement (PMC3583181; doi:10.1186/1741-7007-10-67), 2012-07-31

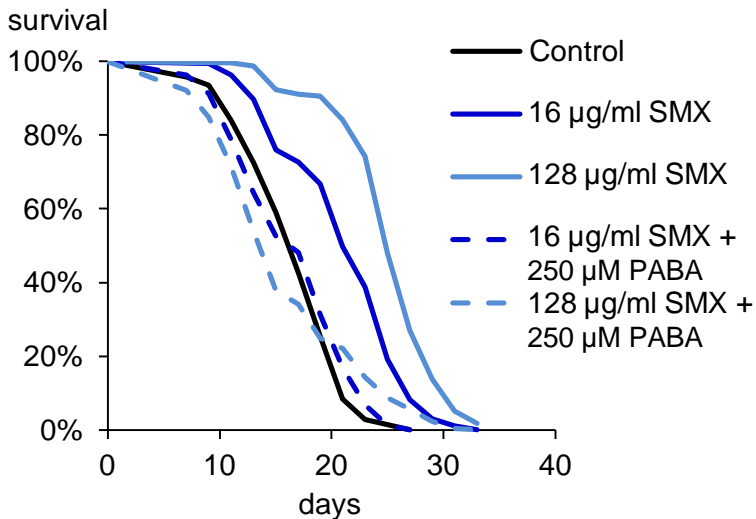

Supplement: 1741-7007-10-67-S6.pdf [file 1741-7007-10-67-S6.pdf]
